# Supplementary material
Source: PubMed Central journal article supplement (PMC4922007)
Supplement: NIHMS795658-supplement-01.pdf [file NIHMS795658-supplement-01.pdf]

## Supplemental Methods

### **Establishment of Instrument Compensation Settings**

1. Add 50 $\mu$ l healthy donor whole blood to each tube labeled as Unstained, Alexa488, FITC, PE, Qdot605, PerCP, PacBlue, Alexa647, and Alexa700.
2. Add 20 $\mu$ l of appropriate compensation cocktail to corresponding tube.
3. Incubate 20 minutes at ambient temperature in the dark.
4. Lyse samples by adding 1mL of BD Pharmlyse (prepare fresh with 18mL DI H<sub>2</sub>O and 2mL 10X stock BD Pharmlyse) and incubating 15 minutes at room temperature.
5. Centrifuge 5 minutes at 400xg.

6. Decant tubes to ~100 $\mu$ l and gently rack rake to resuspend cell pellets.
7. Add 2mL 1X PBS + 2% FBS to tubes and centrifuge 5 minutes at 400xg.
8. Decant tubes to ~100 $\mu$ l and gently rack rake to resuspend cell pellets.
9. Resuspend tubes in 1mL 1% PFA.
10. Transfer 150 $\mu$ l of the unstained tube and compensation tubes to a 96-well plate.
11. Place the plate on the instrument HTS (High Throughput Sampler) unit.
12. Under the instrument setup folder click the 96-well plate icon titled "Compensation Plate".
13. Use appropriate settings for the HTS unit, "Parameter" and "Threshold" in the cytometer. Ensure that all compensation values are set to 0.0.
14. After the plate has finished acquisition all the instrument setup files must be exported.
15. In the FACSDiva "Browser" window, click "Instrument Setup" and chose export FBS files.
16. Export the data for Winlist analysis and compensation determination.

### **Aqua Compensation**

1. Prepare Aqua positive and Aqua negative cells for compensation setup. Peripheral blood mononuclear cells were used and split into two conditions:
  - 1) unstained cells (Aqua negative): cells were fixed/permeabilized in paraformaldehyde/methanol;
  - 2) Aqua stained cells (Aqua positive): cells were fixed/permeabilized in paraformaldehyde/methanol, washed out of methanol in fluorescence-activated cell sorting buffer, and then Aqua stained in PBS. After Aqua staining, cells were quenched with RPMI 10% FBS, fixed with paraformaldehyde, and permeabilized with methonal. The two conditions were then mixed 1:1 and store at -80°C.
2. Add 250 $\mu$ l fixed 1:1 Aqua positive: Aqua negative cells (~250,000 cells) to a tube.
3. Wash cells by adding 2mL PBS + 2%FBS.
4. Centrifuge tube 5 minutes at 400xg.
5. Decant tube to ~100 $\mu$ l and gently rack rake to resuspend cell pellets.
6. Resuspend cells in 1ml PBS + 2%FBS.
7. In FACSDiva "Browser" window, select the "AquaComp" specimen in the "Instrument Setup" folder and ensure that the "AquaComp" tube is active.
8. Place the Aqua comp tube on the instrument, acquire and record the data.
9. Export the data for Winlist analysis and compensation determination.

Supplemental Figure S1: Metrics

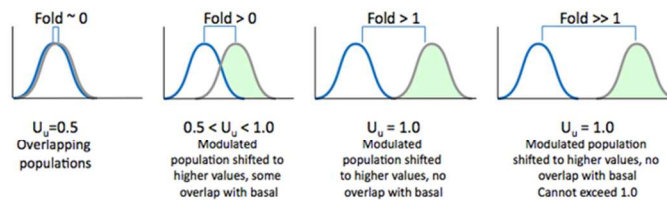

Several classes of metrics are employed to measure basal activities or modulated activities on the myeloid, CD34<sup>+</sup> and nRBC populations. These metrics are calibrated for each instrument, ensuring rigorous comparisons and longitudinal stability of results. Three classes of metrics have been evaluated for this study.

- Fold Change:** Measure of the shift in the median value of the population of cells that display modulation of signaling relative to the basal state. Calculated as  $\log_2 \text{Fold}$ .
- $U_j$ :** Measure of proportion of cells that display induction of signaling relative to basal activity. Rank based metric based on Mann-Whitney U statistic.
- Total Phospho:** Measure of the shift in the median value of the population of cells that display modulation of signaling relative to the autofluorescence state. Calculated as  $\log_2 \text{Total Phospho}$ .

254x190mm (96 x 96 DPI)

Accept

Supplemental Figure S2: GCSF Modulated p-Erk1/2 Activity in Healthy BM Samples

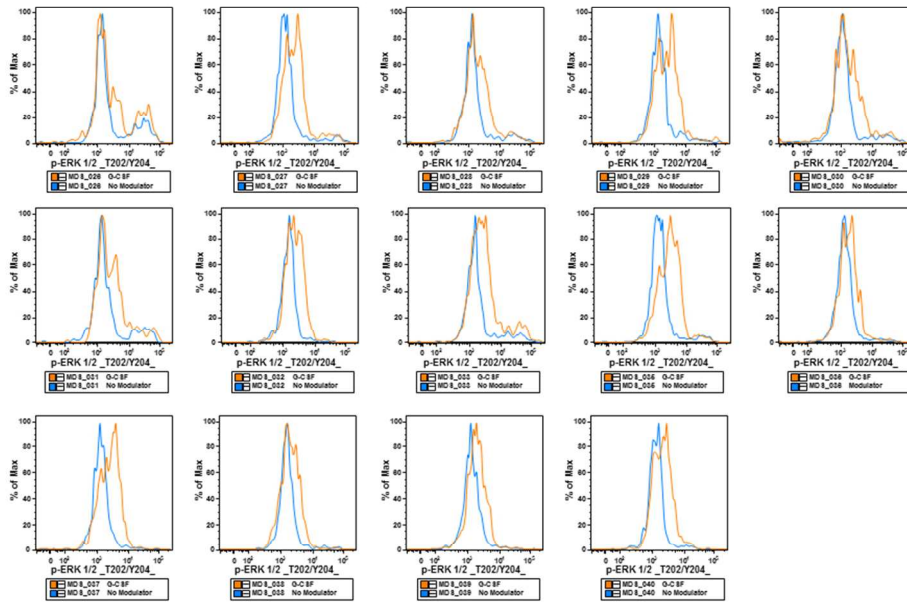

254x190mm (96 x 96 DPI)

Accept

Supplemental Table S1: Characteristics of samples that failed minimum viability/signaling criteria

Screening Failures

| Donor ID | Age | Gender | IPSS  | FAB  | WHO    | Cyto          | WBC (K/uL) | Hgb (g/dL) | Plt (K/ul) | BM Blast (%) | Reason for Failure |
|----------|-----|--------|-------|------|--------|---------------|------------|------------|------------|--------------|--------------------|
| MDS_006  | 72  | M      | INT-1 | RAEB | RAEB-1 | dip           | 2.8        | 10.3       | 56         | 8            | Poor viability     |
| MDS_007  | 62  | F      | INT-1 | RAEB | RAEB-1 | miscellaneous | 11.4       | 11.8       | 3          | 5            | Poor signaling     |
| MDS_008  | 75  | M      | INT-1 | RAEB | RAEB-1 | dip           | 4.1        | 8.2        | 23         | 6            | Poor viability     |
| MDS_011  | 62  | M      | INT-1 | RARS | RARS   | +8            | 3.1        | 13         | 141        | 3            | Poor viability     |
| MDS_012  | 61  | M      | INT-1 | RARS | RARS   | dip           | 2.5        | 9.3        | 50         | 3            | Poor signaling     |

**Poor Viability:** live and non-apoptotic cells (i.e. Aqua and c-PARP negative) < 50%

**Poor Signaling:**

MDS\_007: no GCSF response (Uu=0.44-0.49);

no data for EPO nodes (numbers of events recorded for the nodes were below the cut-off, <100)

MDS\_012: no EPO response (Uu=0.49-0.51);

no data for GCSF nodes (not enough cells for the assay, sample fell off)

254x190mm (96 x 96 DPI)

Accept

Supplemental Table S2: Modulators and Nodes Tested

## A) List of Nodes Tested

| Functional Signaling | Modulator | Node: Readout |          |         |
|----------------------|-----------|---------------|----------|---------|
| STAT Pathway         | EPO       | p-STAT1       | p-STAT3  | p-STAT5 |
| STAT Pathway         | GCSF      | p-STAT1       | p-STAT3  | p-STAT5 |
| PI3K Pathway         | GCSF      | p-Akt         | p-Erk1/2 | p-S6    |

## B) Modulators and Technical Conditions

| Modulator | Final Concentration | Modulation Time | Manufacturer (Location)        |
|-----------|---------------------|-----------------|--------------------------------|
| EPO       | 3 IU/mL             | 15 min          | R&D Systems (Minneapolis, MN ) |
| GCSF      | 50 ng/mL            | 15 min          | R&D Systems (Minneapolis, MN ) |

254x190mm (96 x 96 DPI)

Accept

Supplemental Table S3: Antibodies and Non-Antibody Reagents

| Antibody                               | Species & Isotype | Clone     | Fluorophore     | Manufacturer (Location)     |
|----------------------------------------|-------------------|-----------|-----------------|-----------------------------|
| CD34                                   | Mouse IgG1        | 8G12      | PerCP           | BD (San Jose, CA)           |
| CD45                                   | Mouse IgG1        | HI30      | Alexa Fluor 700 | Invitrogen (Carlsbad, CA)   |
| CD71                                   | Mouse IgG2a, k    | M-A712    | Biotin          | BD (San Jose, CA)           |
| CD235a                                 | Mouse IgG2b, k    | HIR2      | PE              | eBioscience (San Diego, CA) |
| p-STAT1 (Y701)                         | Mouse IgG2a       | 4a        | Alexa Fluor 488 | BD (San Jose, CA)           |
| p-STAT3 (Y705)                         | Mouse IgG2a, k    | 4/P-STAT3 | Pacific Blue    | BD (San Jose, CA)           |
| p-STAT5 (Y694)                         | Mouse IgG1        | 47        | Alexa Fluor 647 | BD (San Jose, CA)           |
| p-Akt (S473)                           | Rabbit IgG        | 193H12    | Alexa Fluor 647 | CST (Danvers, MA)           |
| p-S6 (S205/236)                        | Rabbit IgG        | 2F9       | Alexa Fluor 488 | CST (Danvers, MA)           |
| p-Erk1/2 (T202/204)                    | Mouse IgG1        | 20A       | Pacific Blue    | BD (San Jose, CA)           |
| cleaved PARP (Asp214)                  | Mouse IgG1, k     | F21-852   | FITC            | BD (San Jose, CA)           |
| Non-Antibody                           |                   |           |                 | Manufacturer (Location)     |
| Live/Dead Fixable Aqua Dead Cell Stain |                   |           |                 | Invitrogen (Carlsbad, CA)   |
| Streptavidin-Qdot605                   |                   |           |                 | Invitrogen (Carlsbad, CA)   |

254x190mm (96 x 96 DPI)

Accept

Supplemental Table S4: Antibody Staining Panels and Compensation Settings

## A) List of Antibody Staining Panel

| Staining Panel | Alexa488 | PE     | Qdot605 | PerCP | Pacific Blue | Aqua | Alexa647 | Alexa700 |
|----------------|----------|--------|---------|-------|--------------|------|----------|----------|
| STAT Pathway   | p-STAT1  | CD235a | CD71    | CD34  | p-STAT3      | Aqua | p-STAT5  | CD45     |
| PI3K Pathway   | p-S6     | CD235a | CD71    | CD34  | p-Erk1/2     | Aqua | p-Akt    | CD45     |

  

| Staining Panel | FITC         | PerCP | Aqua | Alexa700 |
|----------------|--------------|-------|------|----------|
| Viability      | Cleaved PARP | CD34  | Aqua | CD45     |

254x190mm (96 x 96 DPI)

Accept



## B) List of Compensation Matrix

Compensation Matrix of STAT Staining Panel

|                   | Alexa Fluor 488-A | PE-A  | Qdot 605-A | PerCP-A | Pacific Blue-A | Aqua-A | Alexa Fluor 647-A | Alexa Fluor 700-A |
|-------------------|-------------------|-------|------------|---------|----------------|--------|-------------------|-------------------|
| Alexa Fluor 488-A |                   | 16.98 | 4.05       | 1.50    | 0.00           | 0.40   | 0.00              | 0.00              |
| PE-A              | 0.99              |       | 40.97      | 22.23   | 0.00           | 7.08   | 0.00              | 0.00              |
| Qdot 605-A        | 0.23              | 2.17  |            | 1.28    | 0.00           | 8.85   | 0.00              | 0.00              |
| PerCP-A           | 0.05              | 0.00  | 0.00       |         | 0.00           | 0.00   | 10.42             | 3.50              |
| Pacific Blue-A    | 0.10              | 0.00  | 0.00       | 0.00    |                | 11.60  | 0.00              | 0.00              |
| Aqua-A            | 0.13              | 0.00  | 0.00       | 0.00    | 15.26          |        | 0.00              | 0.00              |
| Alexa Fluor 647-A | 0.10              | 0.00  | 0.00       | 2.44    | 0.05           | 0.05   |                   | 40.61             |
| Alexa Fluor 700-A | 0.57              | 0.21  | 0.14       | 3.26    | 0.07           | 0.15   | 5.61              |                   |

Compensation Matrix of PI3K Staining Panel

|                   | Alexa Fluor 488-A | PE-A  | Qdot 605-A | PerCP-A | Pacific Blue-A | Aqua-A | Alexa Fluor 647-A | Alexa Fluor 700-A |
|-------------------|-------------------|-------|------------|---------|----------------|--------|-------------------|-------------------|
| Alexa Fluor 488-A |                   | 13.86 | 3.61       | 1.37    | 0.00           | 0.51   | 0.00              | 0.00              |
| PE-A              | 1.34              |       | 35.61      | 20.12   | 0.00           | 5.39   | 0.00              | 0.00              |
| Qdot 605-A        | 0.09              | 4.33  |            | 1.01    | 0.00           | 8.03   | 0.06              | 0.00              |
| PerCP-A           | 0.00              | 0.00  | 0.00       |         | 0.00           | 0.00   | 16.88             | 5.04              |
| Pacific Blue-A    | 0.00              | 0.00  | 0.00       | 0.00    |                | 11.10  | 0.00              | 0.00              |
| Aqua-A            | 0.68              | 0.16  | 0.06       | 0.00    | 25.50          |        | 0.00              | 0.00              |
| Alexa Fluor 647-A | 0.00              | 0.00  | 0.00       | 2.83    | 0.06           | 0.00   |                   | 34.15             |
| Alexa Fluor 700-A | 0.57              | 0.20  | 0.13       | 3.28    | 0.13           | 0.15   | 6.63              |                   |

Compensation Matrix of Viability Staining Panel

|                   | FITC-A | PerCP-A | Aqua-A | Alexa Fluor 700-A |
|-------------------|--------|---------|--------|-------------------|
| FITC-A            |        | 2.21    | 1.57   | 0.00              |
| PerCP-A           | 0.05   |         | 0.00   | 3.50              |
| Aqua-A            | 0.13   | 0.00    |        | 0.00              |
| Alexa Fluor 700-A | 0.57   | 3.26    | 0.15   |                   |

254x190mm (96 x 96 DPI)

Accept
